# Supplementary material
Source: PubMed Central journal article supplement (PMC9751272)
Supplement: 41396_2022_1323_MOESM1_ESM.pdf [file 41396_2022_1323_MOESM1_ESM.pdf]

Supplementary Materials

Supplementary Figures

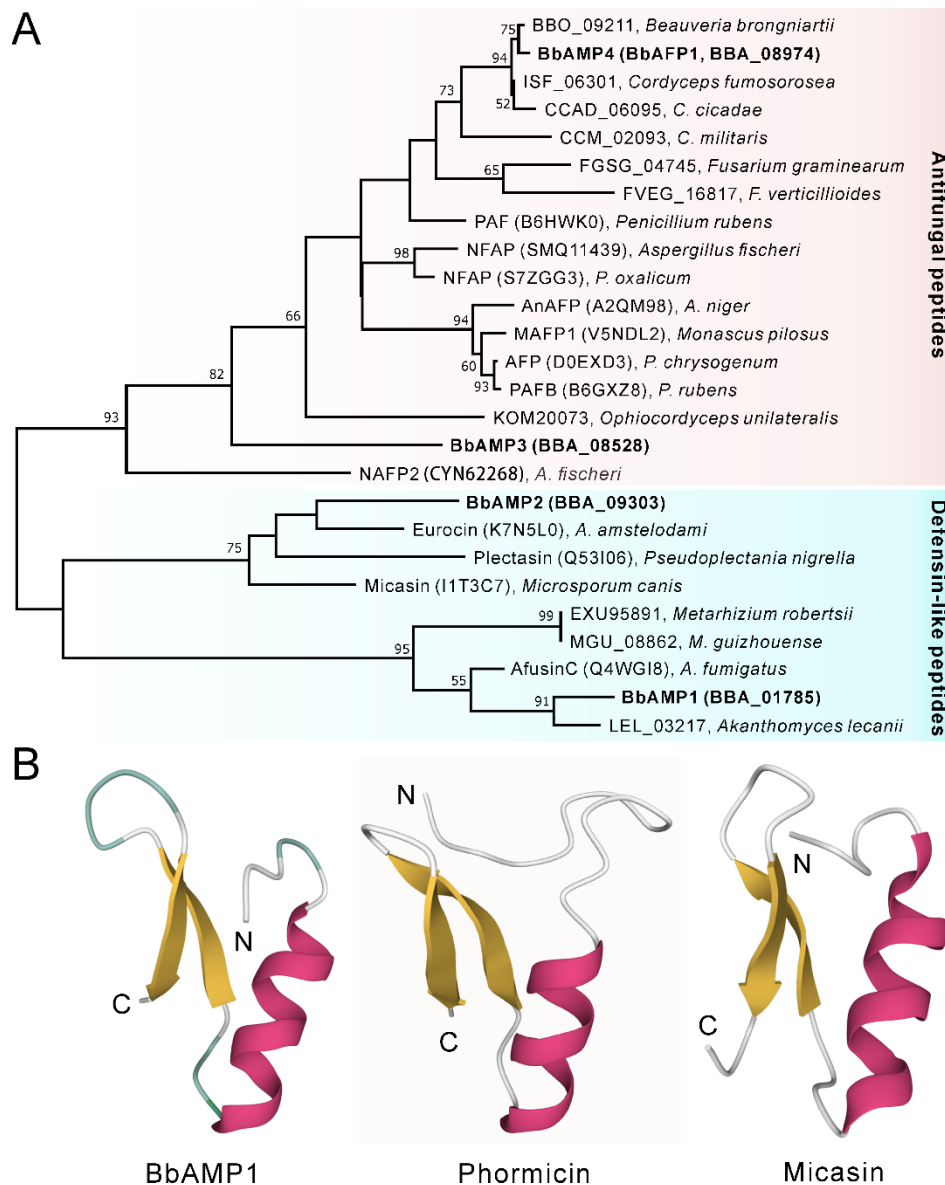

**Fig. S1 Phylogenetic and structural analyses of BbAMP1 and its related peptides.** (A) Phylogenetic analysis of the putative antimicrobial proteins encoded by *B. bassiana* and the other fungi. The maximum-likelihood tree was inferred using a Jones-Taylor-Thornton matrix-based model with 500 bootstrap replicates. The putative AMPs from *B. bassiana* are highlighted in bold. (B) Structure comparison of the predicted mature BbAMP1 with phormicin and micasin. Phormicin (structure accession: 1ICA) is from the blowfly (*Phormia terranova*, now named *Protophormia terranova*) and micasin (I1T3C7) is from the dermatophytic fungal (*Microsporium canis*). N and C represent the N- and C-terminus, respectively.

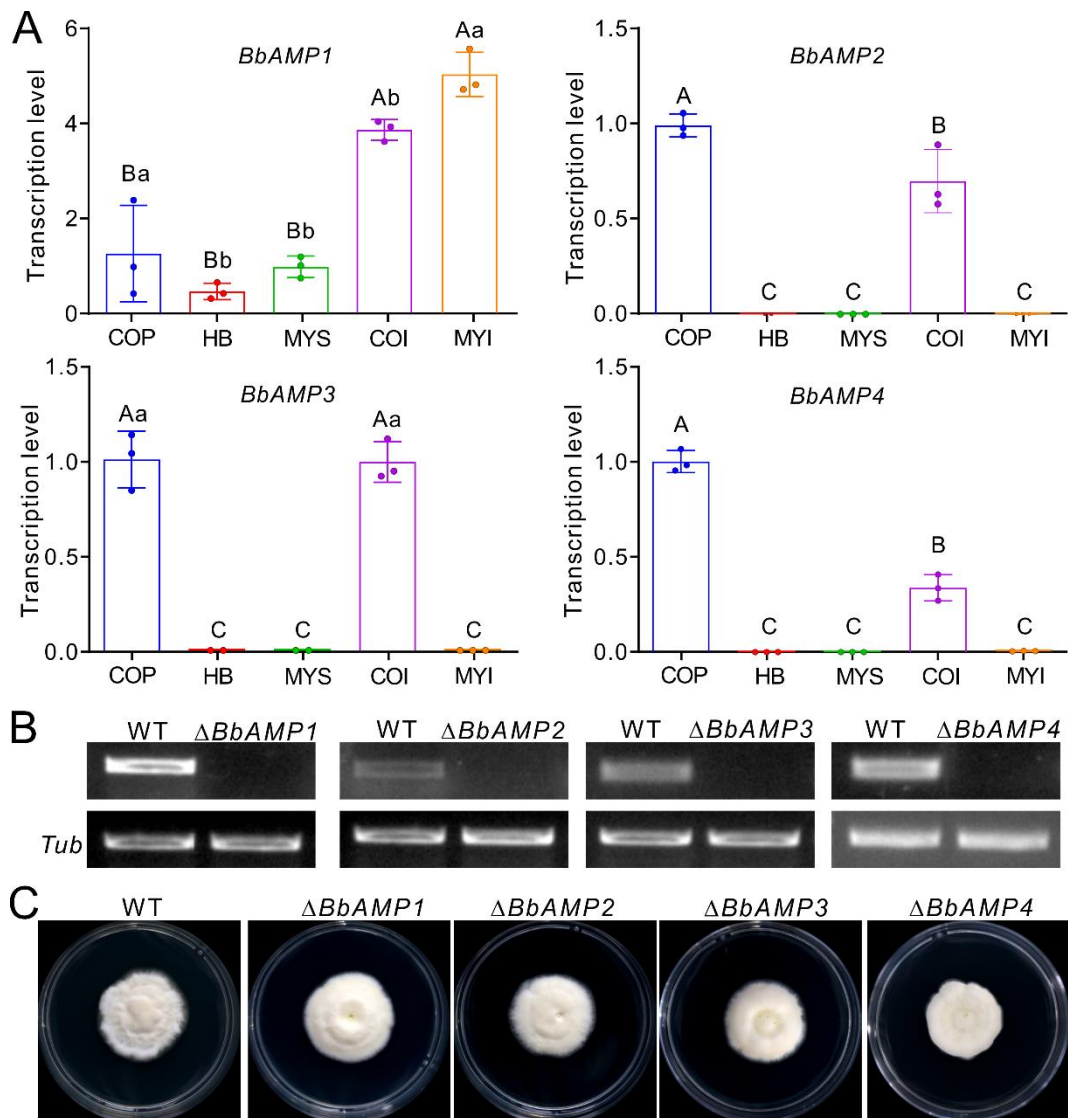

**Fig. S2 Gene expression, deletion and mutant phenotyping.** (A) Quantitative expression of four putative antimicrobial genes by *B. bassiana* at different stages. COP, conidia harvested from the PDA cultures; HB, hyphal body cells harvested from insect hemocoel; MYS, mycelia harvested from the SDB broth; COI, conidial spores harvested from the cadavers of *G. mellonella*; MYI, mycelial cells collected from the inside of insect cadavers. Different letters labelled above each column indicate  $p < 0.01$  (capital) and  $p < 0.05$  (lowercase) of different inductive media after one-way ANOVA analysis. (B) RT-PCR verification of gene deletions. Conidia of the WT and putative mutants were harvested from the two-week-old PDA plates for RNA extraction and RT-PCR analysis. *Tub*, the  $\beta$ -tubulin gene was used as a reference. (C) No obvious phenotype differences between WT and mutants after growth on PDA for two weeks.

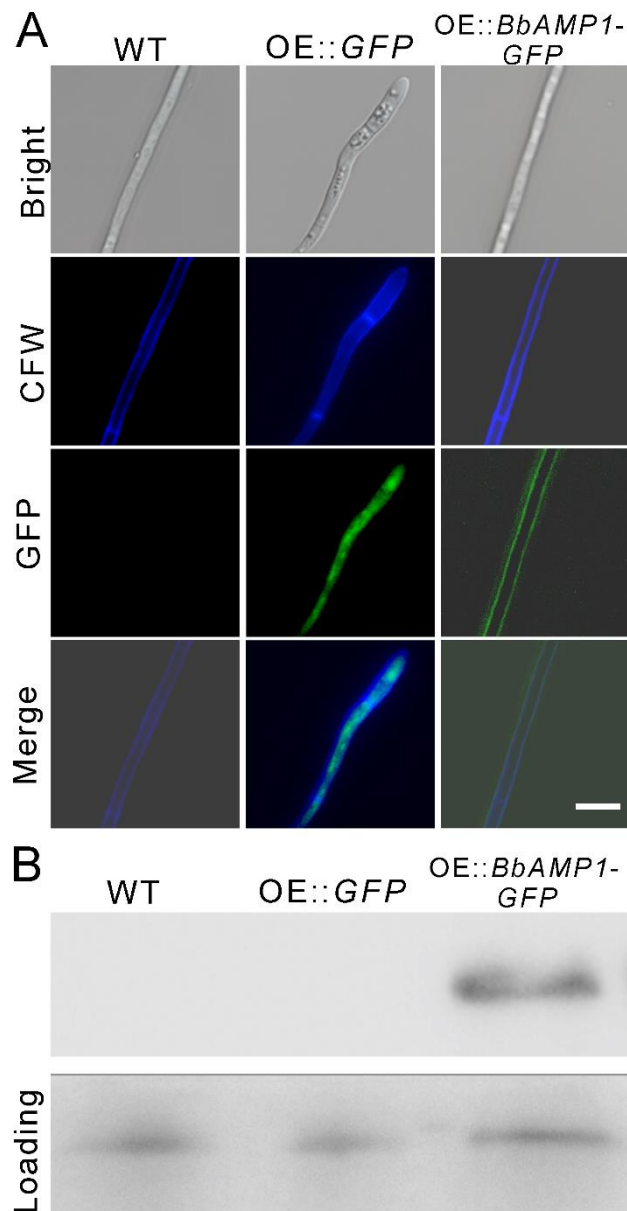

**Fig. S3 BbAMP1 localization and secretion analysis.** (A) Localization of BbAMP1 on the cell wall of mycelia. CFW, Calcofluor white for staining cell wall chitin component. Bar, 10  $\mu$ m. (B) Detection of the fused BbAMP1-GFP in culture filtrate. The spores of the WT and mutants were inoculated in SDB for three days, and the culture filtrates of each strain were concentrated for Western blot analysis with an anti-GFP antibody. The SDS-PAGE analysis of the concentrated samples was included as the loading control.

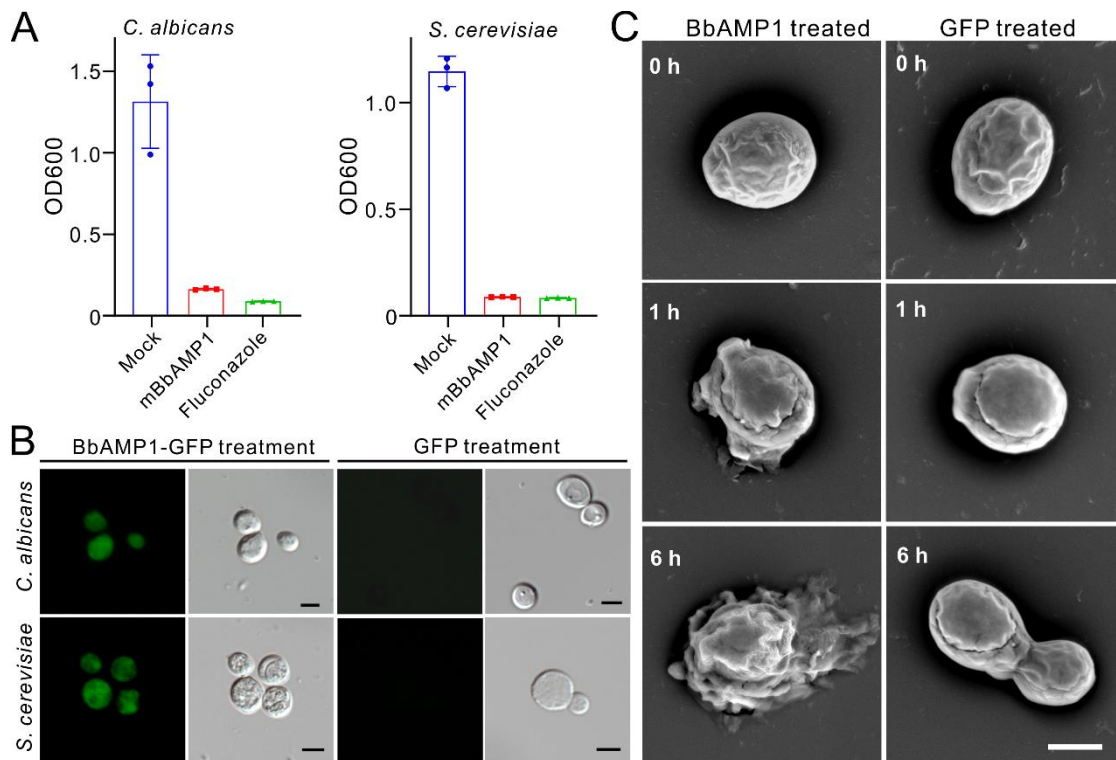

**Fig. S4 BbAMP1 inhibition of yeast cells.** (A) Antifungal assay of mBbAMP1 against two yeast species. The yeast cells were incubated in YPD broth with or without the addition of mBbAMP1 (at a final concentration of 20  $\mu\text{M}$ ) for overnight before the measurement of OD<sub>600</sub> value. The antifungal drug fluconazole (at a final concentration of 100  $\mu\text{g mL}^{-1}$ ) was used as a control. (B) Binding of yeast cells by BbAMP1-GFP. The yeast cells were incubated with either BbAMP1-GFP or GFP protein for one hour before imaging. Bar, 3  $\mu\text{m}$ . (C) Lysis of *S. cerevisiae* cells by BbAMP1. The treatment with a pure GFP protein was used as a control. Bar, 3  $\mu\text{m}$ .

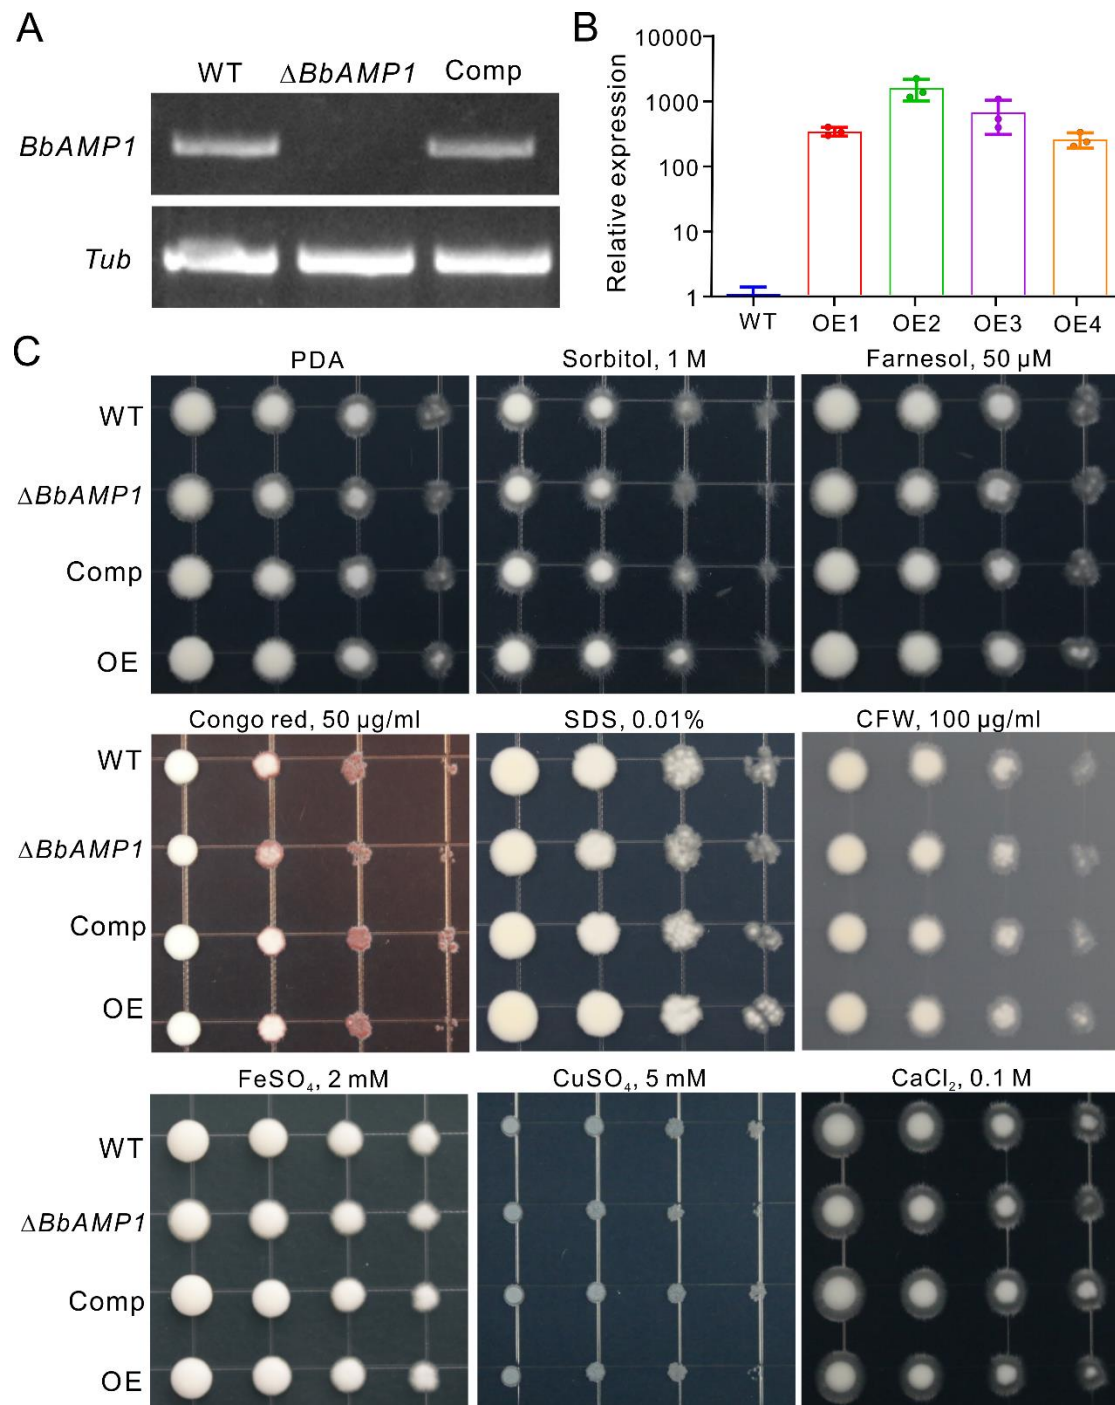

**Fig. S5 Generation and phenotyping of *BbAMP1* mutants.** (A) PCR verification of the gene complementation (Comp) strain. (B) qPCR examination of the independently acquired overexpression (OE) mutants. The highest expression strain OE2 was then simplified as OE and used for further experiments. (C) No obvious difference of fungal growth between strains after inoculation on PDA or PDA amended with stress factors at the indicated concentrations for two weeks. CFW, Calcofluor white.

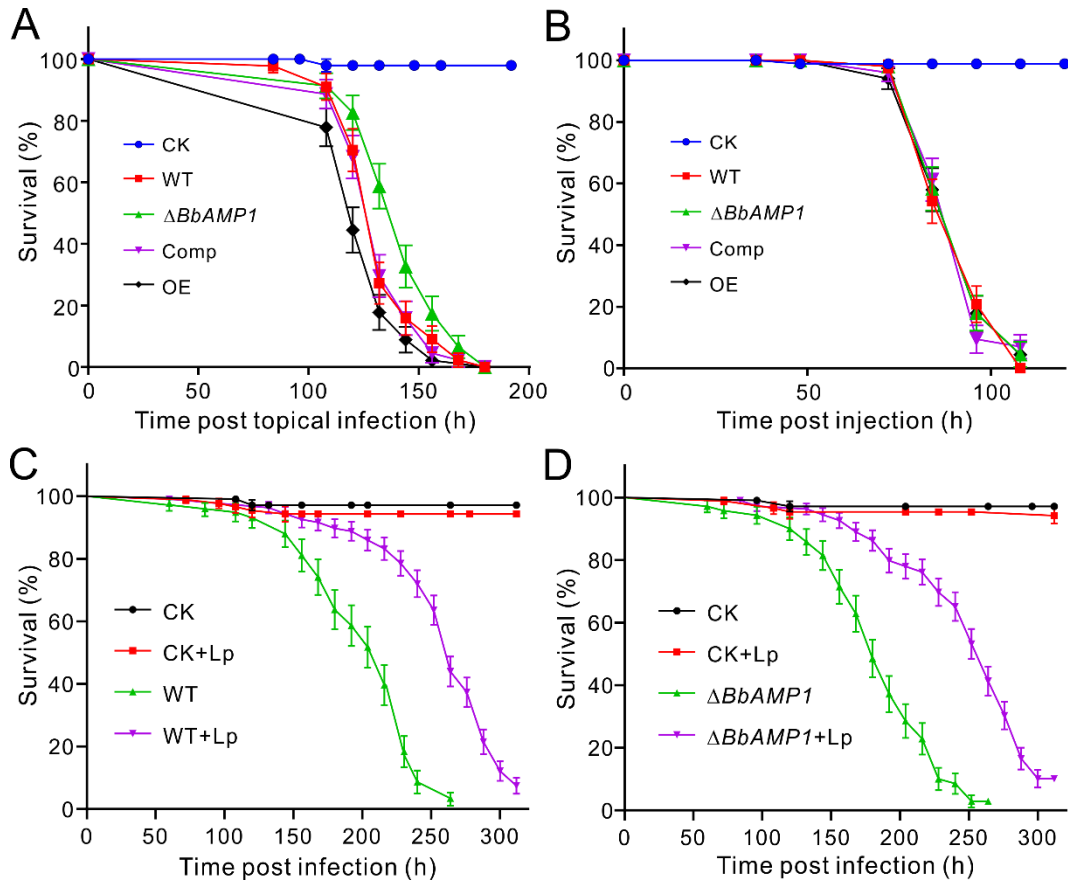

**Fig. S6 Insect survival assays.** (A, B) Survivals of the wax-moth larvae after topical infection (A) and injection (B) with different strains of *B. bassiana*. Significant difference of insect survivals was observed between WT and  $\Delta BbAMP1$  ( $\chi^2 = 5.26$ ;  $p = 0.022$ ) and between WT and OE ( $\chi^2 = 4.11$ ;  $p = 0.043$ ). The mock control (CK) was treated with 0.05% Tween 20. (C, D) Survivals of the axenic flies after topical infection with the WT (C) and  $\Delta BbAMP1$  (D) spores with and without the addition of the *L. plantarum* (Lp) cells. Relative to the treatments without bacterial cells, fly survivals were significantly extended after treating with the WT ( $\chi^2 = 63.94$ ;  $p < 0.0001$ ) and  $\Delta BbAMP1$  ( $\chi^2 = 76.33$ ;  $p < 0.0001$ ) strains plus the addition of *L. plantarum*. The flies treated with 0.05% Tween 20 with or without the addition of Lp were included as the controls (CK and CK+Lp).

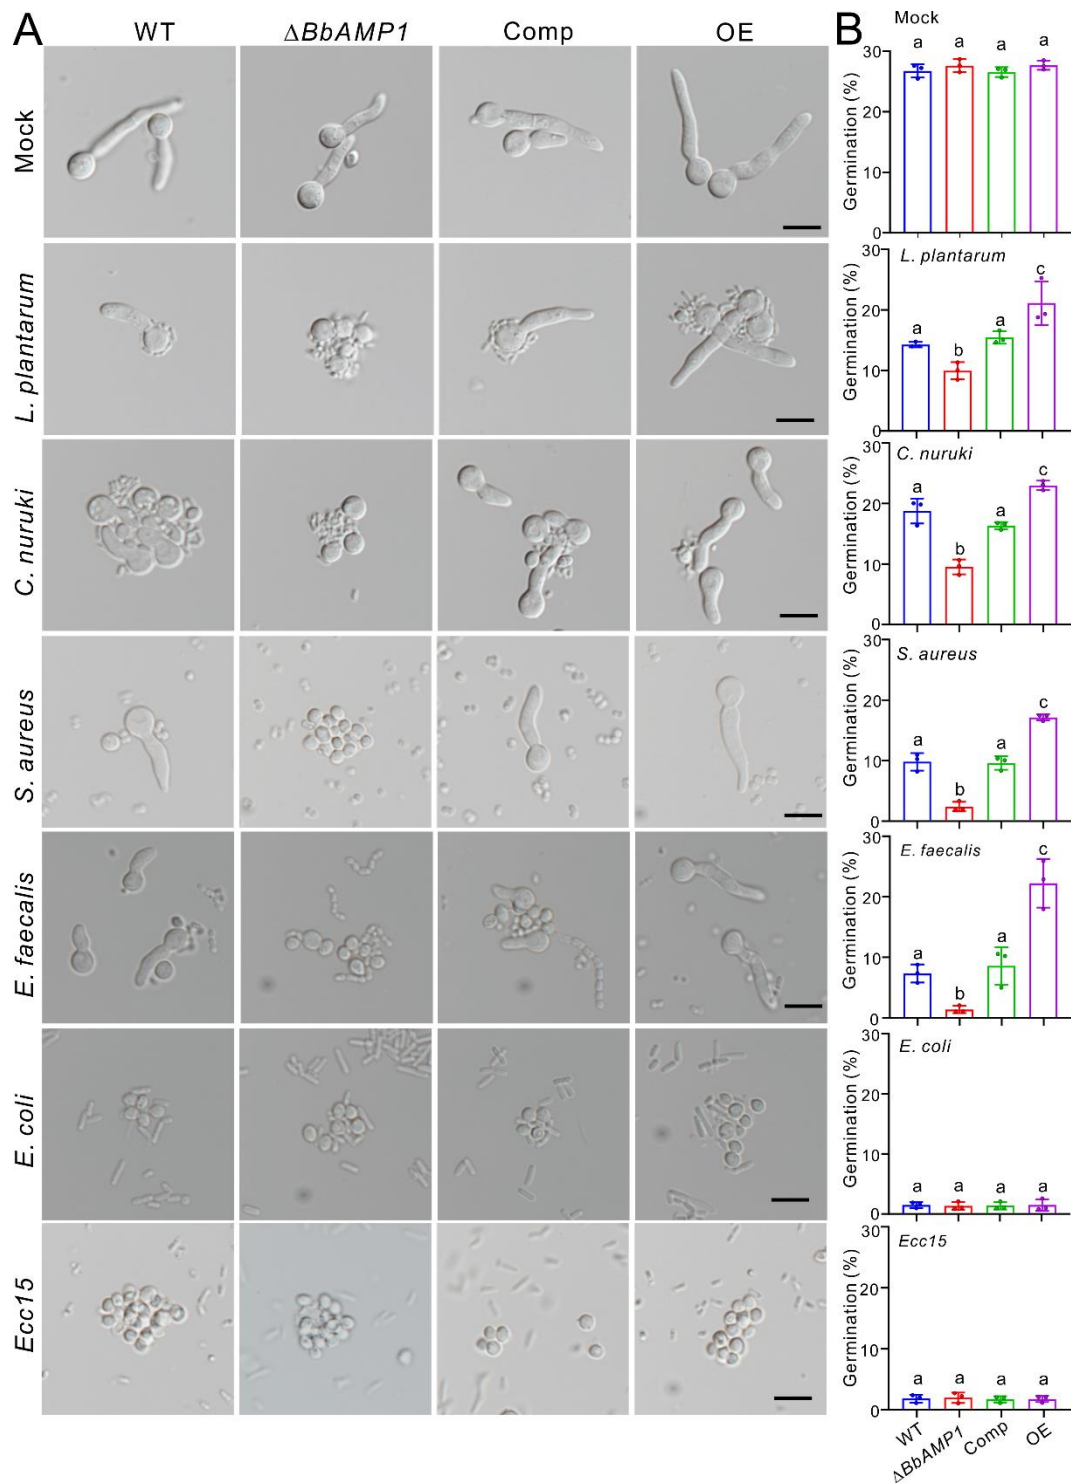

**Fig. S7 Inhibition of spore germinations by different bacteria.** (A) Microscopic imaging of bacterial inhibition of fungal spore germinations. Bar, 5  $\mu$ m. (B) Statistical comparison of the spore germination rates of different *Beauveria* strains after challenge with different bacteria each at a final OD<sub>600</sub> of 0.01. Values are mean  $\pm$  SD. The letters shown above each column represent the significance of difference as tested by one-way ANOVA analysis. Different letters within each panel indicate  $p < 0.05$ .

## Supporting Tables:

**Table S1.** PCR primers used in this study.

| Gene                           | Primers                         | Primer sequences                                        | RE     | Notes                |
|--------------------------------|---------------------------------|---------------------------------------------------------|--------|----------------------|
| BBA_01785<br>( <i>BbAMP1</i> ) | KO UF                           | ATCGAATTCCTGCAGACGAAACGGAAGGATTGA                       | Pst I  | Gene deletion        |
|                                | KO UR                           | TCCCCCGGGCTGCAGCAGCCAGTGGATGGTGAA                       |        |                      |
|                                | KO DF                           | ATCTGATGAACTAGTGTCTGCGAGGCTCATTGCT                      | Spe I  |                      |
|                                | KO DR                           | CGCTCTAGAACTAGTCAAACGCTGGCTCGTCAA                       |        |                      |
|                                | TF                              | AACGGAAGGATTGATTAGAC                                    |        | Deletion             |
|                                | TR                              | GACGCAAGTTGCTTTAGG                                      |        | verification         |
|                                | OE F                            | AACAAGTCTAGTCTAGAATGAAGTTCTCCCTCG                       | Xba I  | Gene overexpression  |
|                                | OE R                            | TGGCGGCCGCTCTAGACTAGTTGCAGTAGCA                         |        |                      |
|                                | RT F                            | TGCTGGGACTCCGTTACTT                                     |        | RT-PCR               |
|                                | RT R                            | AGTAGCACACTTCGCCTTTG                                    |        |                      |
|                                | Comp F                          | ATCGAATTCCTGCAGTGGCGTCTACATTGACA                        | Pst I  | Gene complementation |
|                                | Comp R                          | CCTGTCTGAGCTGCAGCTAGTTGCAGTAGCAC                        |        |                      |
|                                | qRT F                           | AAGCGCAGCAACGATGA                                       |        | RT-qPCR              |
|                                | qRT R                           | AGCAACGTACGGAGCAATAC                                    |        |                      |
|                                | GST F                           | GGGCCCTGGGATCCGACGACGACGACAAGAGCG<br>CCTGTTGCAGC        | BamH I | Protein expression   |
|                                | GST R                           | GGAATTCGGGGATCCCTAATGATGATGATGATGAT<br>GGTTGCAGTAGCACAC |        |                      |
|                                | pYes F                          | ACCGAGCTCGGATCCAACATGTCTAGCGCCTGTTG<br>CAGC             | BamH I | Yeast expression     |
|                                | pYes R                          | GTTACTAGTGGATCCCTAGTTGCAGTAGCA                          |        |                      |
|                                | EX F1                           | AACAAGTCTAGTCTAGAATGAAGTTCTCCCTCG                       | Xba I  | Gene fusion          |
|                                | EX R1                           | CTCGCCCTTGCTCACGTTGCAGTAGCACAC                          |        |                      |
| EX F2                          | GTGTGCTACTGCAACGTGAGCAAGGGCGAG  |                                                         |        |                      |
| EX R2                          | TGGCGGCCGCTCTAGATTACTTGTACAGCTC |                                                         |        |                      |
| BBA_09303<br>( <i>BbAMP2</i> ) | KO UF                           | ATCGAATTCCTGCAGGATGGGAGAAGAAGAGGG                       | Pst I  | Gene deletion        |
|                                | KO UR                           | TCCCCCGGGCTGCAGCAATAGCTGTGGGAAGGA                       |        |                      |
|                                | KO DF                           | ATCTGATGAACTAGTCTGGGCGTAAAGTCAACA                       | Spe I  |                      |
|                                | KO DR                           | CGCTCTAGAACTAGTCTCTGAGGGAAGCGGTGA                       |        |                      |
|                                | TF                              | GGTTGGGCGAGAAAGGTC                                      |        | Deletion             |
|                                | TR                              | TGTTGAATAGCAGCGAAG                                      |        | verification         |
|                                | RT F                            | TGAAGGCCTTACTAGTCTCTTTG                                 |        | RT-PCR               |
|                                | RT R                            | CTATAGACACAGACGCAGGTTG                                  |        |                      |
|                                | qRT F                           | TGCCCGAATGAAATCAAC                                      |        | RT-qPCR              |
|                                | qRT R                           | CCGGTAGGCTTGATAGTTCTG                                   |        |                      |
| BBA_08528<br>( <i>BbAMP3</i> ) | KO UF                           | ATCGAATTCCTGCAG TCTGTTTCGGGTGGTCAA                      | Pst I  | Gene deletion        |
|                                | KO UR                           | TCCCCCGGGCTGCAG CCAGGTGCGTCATCATTT                      |        |                      |
|                                | KO DF                           | ATCTGATGAACTAGTGTTCGGAGCCGTCCCTAT                       | Spe I  |                      |
|                                | KO DR                           | CGCTCTAGAACTAGTCCCGCTAATCAGCAAGCA                       |        |                      |
|                                | TF                              | GTCTCCTATCCCCTCTCCG                                     |        | Deletion             |
|                                | TR                              | CTTTCATTCACTGCCACA                                      |        | verification         |
|                                | RT F                            | CAAGTGGTTTTGGCGTTCT                                     |        | RT-PCR               |
|                                | RT R                            | CAGCCGCCATCGTTACTC                                      |        |                      |



|                         |               |                                    |        |                                     |
|-------------------------|---------------|------------------------------------|--------|-------------------------------------|
|                         | qRT F         | TGCAACTTCAAGCGCAAC                 |        |                                     |
|                         | qRT R         | TTAGCTGCAGACGGTAATTCT              |        | RT-qPCR                             |
|                         | KO UF         | ATCGAATTCCTGCAGTTTGAGGAAGAGCGAGAA  | Pst I  | Gene deletion                       |
|                         | KO UR         | TCCCCGGGCTGCAGTTTGCCAACAAGAGGGTA   |        |                                     |
|                         | KO DF         | ATCTGATGAACTAGTTGGGATAGTCGGGCTGTT  | Spe I  |                                     |
|                         | KO DR         | CGCTCTAGAACTAGTCGATTTCAAGTTTGCCTCC |        |                                     |
| BBA_08974               | TF            | TTGTCATGCTTGGGTAATC                |        | Deletion                            |
| (BbAMP4)                | TR            | CAATCGCAAACCATCAGT                 |        | verification                        |
|                         | RT F          | TCGTCTTGGCCTTGGTG                  |        | RT-PCR                              |
|                         | RT R          | GCAGATTATTTCCATCGCACT              |        |                                     |
|                         | qRT F         | TGCAACTTCAAGCGCAAC                 |        | RT-qPCR                             |
|                         | qRT R         | TTAGCTGCAGACGGTAATTCT              |        |                                     |
|                         | TubRT F       | AACATGGTTCCTTTCCCTCGTCCTC          |        | RT-PCR analysis                     |
| $\beta$ -tubulin gene   | TubRT R       | TTCCTCATCATCAATGCCAGCGT            |        |                                     |
|                         | Tubq F        | GTATGGACGAGATGGAGTTCAC             |        | RT-qPCR analysis                    |
|                         | Tubq R        | CTCGTATTCCTCTTCCATCATC             |        |                                     |
|                         | pSUC2-F       | GGTGTGAAGTGGACCAAAGGTCTA           |        | Yeast signal-sequence trap analysis |
|                         | pSUC2-R       | CCTCGTCATTGTTCTCGTTCCTT            |        |                                     |
|                         | pSUC2-BLys2F  | TTAATTAAGAATTCATGACTCGATTTACTACC   | EcoR I |                                     |
| BbAMP1 secretion        | pSUC2-BLys2R  | AGGGAGAACCTCGAGCTTGTAGCTGCACTTGGC  | Xho I  |                                     |
|                         | pSUC2-BbAMP1F | TTAATTAAGAATTCATGAAGTTCTCCCTCGTC   | EcoR I |                                     |
|                         | pSUC2-BbAMP1R | AGGGAGAACCTCGAGGGAGTCCCAGCAGAAGGC  | Xho I  |                                     |
|                         |               |                                    |        |                                     |
| Fly <i>Rpl32</i>        | Rpl32F        | GACGCTTCAAGGGACAGTATCTG            |        | Fungal load assay                   |
|                         | Rpl32R        | AAACGCGGTTTCTGCATGAG               |        |                                     |
| Bb 18S rRNA             | Bb18S-F       | TGGTTTCTAGGACCGCCGTAA              |        | Fungal load assay                   |
|                         | Bb18S-R       | CCTTGGCAAATGCTTTTCGC               |        |                                     |
| Bacterial 16S RNA genes | 27F           | AGAGTTTGATCMTGGCTCAG               |        | 16S rRNA                            |
|                         | 1492R         | TACGGYTACCTTGTTACGACTT             |        | amplification                       |
|                         | 515F          | GTGCCAGCMGCCGCGG                   |        | Microbiome                          |
|                         | 806R          | GGACTACNNGGATCTAAT                 |        | sequencing                          |

**Table S2.** Statistical comparison of the median lethal time (LT<sub>50</sub>) between WT and mutant strains against the females of *Drosophila melanogaster*.

| <b>Experiment*</b> | <b>Strains</b>  | <b>LT<sub>50</sub> (h)</b> | <b>Significance</b>          |
|--------------------|-----------------|----------------------------|------------------------------|
| Experiment 1       | WT              | 168±3.920                  | -                            |
|                    | $\Delta BbAMP1$ | 192±6.007                  | $\chi^2=8.872$ ; $P = 0.003$ |
|                    | $\Delta BbAMP2$ | 168±4.676                  | $\chi^2=0.751$ ; $P = 0.386$ |
| Experiment 2       | WT              | 176±6.461                  | -                            |
|                    | $\Delta BbAMP3$ | 184±4.009                  | $\chi^2=0.064$ ; $P = 0.801$ |
|                    | $\Delta BbAMP4$ | 176±5.545                  | $\chi^2=0.000$ ; $P = 0.997$ |

\*, Two batches of experiments were conducted with the WT and respective mutant strains.
